# Supplementary material for: Cloning and functional analysis of the FAD2 gene family from desert shrub Artemisia sphaerocephala
Source: PubMed Central journal article supplement (PMC6839233; doi:10.1186/s12870-019-2083-5), 2019-11-08
Supplement: 12870_2019_2083_MOESM4_ESM.pdf [file 12870_2019_2083_MOESM4_ESM.pdf]

|           |     |   |   |   |   |   |   |   |   |   |   |   |   |   |   |   |   |   |   |   |   |   |   |   |   |   |   |   |   |   |   |   |   |   |   |   |   |   |   |   |   |   |   |   |   |   |   |   |   |   |   |   |   |   |   |   |   |   |   |   |   |   |   |   |   |   |   |   |   |   |   |   |   |   |   |   |   |    |   |    |   |    |    |    |     |    |     |     |     |     |     |     |     |
|-----------|-----|---|---|---|---|---|---|---|---|---|---|---|---|---|---|---|---|---|---|---|---|---|---|---|---|---|---|---|---|---|---|---|---|---|---|---|---|---|---|---|---|---|---|---|---|---|---|---|---|---|---|---|---|---|---|---|---|---|---|---|---|---|---|---|---|---|---|---|---|---|---|---|---|---|---|---|---|----|---|----|---|----|----|----|-----|----|-----|-----|-----|-----|-----|-----|-----|
| AhFAD2-1  | ... | S | P | L | F | Y | L | A | W | L | L | G | A | V | O | G | G | C | L | T | G | W | V | A | A | H | E | C | G | H | A | F | S | D | Y | Q | L | D | D | T | V | G | L | L | F | S | G | L | L | P | Y | F | S | W | K | Y | S | H | R | R | H | S | N | T | G | S | L | D | R | D | E | V | F | V | P | K | K | S  | S | I  | A | .  | W  | M  | S   | .. | K   | Y   | 171 |     |     |     |     |
| AhFAD2-2  | ... | Y | P | F | S | F | L | A | W | P | Y | I | W | A | I | O | G | G | C | L | T | G | W | V | A | A | H | E | C | G | H | A | F | S | D | Y | Q | L | V | D | D | V | G | L | L | F | S | C | L | L | P | Y | F | S | W | K | Y | S | H | R | R | H | S | N | T | G | S | L | D | R | D | E | V | F | V | P | K | P  | K | S  | K | S  | V  | S  | .   | Y  | N   | ..  | K   | Y   | 167 |     |     |
| AsFAD2-1  | ... | V | P | L | S | S | L | A | W | M | A | V | W | A | O | C | G | C | V | L | T | G | W | V | A | A | H | E | C | G | H | A | F | S | D | Y | Q | V | V | D | D | T | V | G | F | L | S | L | L | P | Y | F | S | W | K | Y | S | H | R | R | H | S | N | T | G | S | L | D | R | D | E | V | F | V | P | K | P | R  | S | Q  | P | .  | Y  | S  | ..  | K  | Y   | 169 |     |     |     |     |     |
| AsFAD2-2  | ... | T | S | L | N | V | V | A | W | P | V | Y | W | L | O | G | S | I | C | M | G | I | V | M | L | E | C | H | E | C | A | - | G | F | C | D | Y | H | V | L | N | D | T | V | G | Y | F | L | T | S | L | L | P | Y | F | S | F | K | Y | S | H | G | R | H | A | H | T | A | S | L | E | N | E | T | S | Y | P | R  | E | K  | S | G  | L  | S  | ..  | Q  | L   | D   | K   | F   | 168 |     |     |
| AsFAD2-4  | ... | R | F | L | S | F | I | A | W | P | L | Y | W | F | O | G | T | K | L | G | L | V | M | L | E | C | H | E | C | G | H | S | L | F | T | Y | H | V | L | D | D | T | I | G | F | L | S | F | S | F | K | Y | S | H | R | G | H | T | H | T | N | S | I | E | Y | D | E | N | H | I | P | K | R | K | S | D | I | .. | L | Y  | N | .. | E  | I  | 159 |    |     |     |     |     |     |     |     |
| AsFAD2-5  | ... | T | P | I | S | Y | V | A | W | P | Y | W | L | O | G | S | V | C | N | G | L | V | W | I | E | C | H | E | C | G | H | A | F | S | D | Y | P | V | L | N | D | T | I | G | Y | F | L | T | G | N | L | A | P | Y | F | S | W | K | Y | S | H | R | R | H | S | N | T | G | S | L | E | N | D | E | S | F | V | P  | K | K  | S | A  | L  | N  | ..  | S  | S   | A   | R   | L   | 168 |     |     |
| AsFAD2-6  | ... | S | P | L | S | Y | V | A | W | P | Y | W | L | O | G | S | V | C | N | G | L | V | W | I | E | C | H | E | C | G | H | A | F | S | D | Y | P | V | L | N | D | T | I | G | Y | F | L | T | G | N | L | A | P | Y | F | S | W | K | Y | S | H | R | R | H | S | N | T | G | S | L | E | N | D | E | S | F | V | P  | K | K  | S | L  | N  | .. | A   | F  | A   | K   | L   | 168 |     |     |     |
| AsFAD2-7  | ... | T | P | L | A | Y | L | A | W | S | V | W | F | O | G | C | A | S | I | L | T | G | W | V | I | E | C | H | E | C | G | H | A | F | S | D | Y | Q | L | V | D | D | I | V | G | F | V | L | S | F | A | L | T | P | Y | F | S | W | K | Y | S | H | R | S | H | A | N | T | N | S | L | D | N | D | E | V | Y | I  | P | K  | R | K  | S  | V  | N   | I  | .   | Y   | S   | ..  | K   | V   | 168 |
| AsFAD2-8  | ... | K | V | I | Y | I | A | W | P | F | Y | W | Y | Q | L | T | L | G | R | L | V | S | I | G | H | C | S | H | S | F | S | G | C | G | L | D | D | T | I | G | Y | L | I | S | F | A | L | T | P | Y | F | S | F | K | F | S | H | H | H | A | H | T | N | S | I | E | Y | D | E | N | H | I | P | K | R | K | S | D  | R | .. | L | Y  | R  | .. | E   | I  | 159 |     |     |     |     |     |     |
| AsFAD2-9  | ... | H | P | L | P | Y | L | A | W | P | Y | W | F | O | G | C | A | F | L | A | I | V | L | L | E | C | H | E | C | G | H | A | F | S | D | Y | T | V | L | E | D | S | V | G | F | V | I | S | C | L | L | T | P | Y | F | S | W | K | I | S | H | R | R | H | A | N | C | G | S | L | D | R | D | E | V | V | P | K  | T | R  | A | T  | L  | N  | ..  | K  | T   | K   | ..  | F   | I   | 172 |     |
| AsFAD2-10 | ... | G | S | L | A | Y | V | A | W | P | Y | W | A | O | C | G | C | V | L | T | G | W | V | A | A | H | E | C | G | H | A | F | S | D | Y | Q | L | V | D | D | T | V | G | L | V | S | A | L | L | P | Y | F | S | W | K | Y | S | H | R | R | H | S | N | T | G | S | I | E | H | D | E | V | F | V | P | K | L | K  | T | G  | V | R  | .. | S  | T   | A  | ..  | R   | Y   | 172 |     |     |     |
| AsFAD2-11 | ... | P | L | L | Y | I | G | W | P | L | Y | W | L | A | C | C | S | F | L | V | G | W | V | L | E | C | H | E | C | G | H | S | F | S | E | Y | Q | V | I | D | D | T | V | G | F | L | S | F | L | V | M | T | P | Y | F | S | F | K | Y | S | H | R | S | H | A | H | T | N | S | L | E | Y | D | Q | V | Y | I | P  | K | R  | K | S  | D  | T  | ..  | F  | F   | T   | ..  | E   | F   | 169 |     |
| AsFAD2-12 | ... | T | P | L | A | Y | I | A | W | P | Y | W | F | O | C | A | S | I | L | T | G | W | V | I | E | C | H | E | C | G | H | A | F | S | E | Y | Q | V | V | D | D | T | V | G | V | L | S | F | L | F | T | P | Y | F | S | W | K | Y | S | H | R | N | H | A | N | T | N | S | I | D | N | D | E | V | Y | I | P | K  | R | K  | S | K  | V  | R  | ..  | V  | Y   | S   | ..  | K   | I   | 167 |     |
| AsFAD2-13 | ... | S | P | L | S | Y | V | A | W | P | Y | W | L | O | G | S | V | C | N | G | L | V | W | I | E | C | H | E | C | G | H | A | F | S | D | Y | P | V | L | N | D | T | I | G | Y | F | L | T | G | N | L | A | P | Y | F | S | W | K | Y | S | H | R | R | H | S | N | T | A | S | L | E | N | D | E | S | F | V | P  | K | K  | S | N  | L  | N  | ..  | A  | S   | A   | R   | L   | 168 |     |     |
| AsFAD2-20 | ... | S | P | L | A | Y | I | A | W | P | Y | W | F | O | C | A | S | I | L | T | G | W | V | I | E | C | H | E | C | G | H | A | F | S | E | Y | Q | V | V | D | D | T | V | G | V | L | S | F | L | F | T | P | Y | F | S | W | K | Y | S | H | R | N | H | A | N | T | N | S | L | D | N | D | E | V | Y | I | P | K  | R | K  | S | K  | V  | R  | ..  | V  | Y   | S   | ..  | K   | I   | 166 |     |
| AsFAD2-21 | ... | R | F | L | S | F | I | A | W | P | L | Y | W | F | O | G | T | K | L | G | L | V | M | L | E | C | H | E | C | G | H | S | L | F | T | Y | H | V | L | D | D | T | I | G | F | L | S | F | V | L | T | P | Y | F | S | F | K | Y | S | H | R | G | H | T | H | T | N | S | I | E | Y | D | E | N | H | I | P | K  | R | K  | S | D  | I  | .. | L   | Y  | N   | ..  | E   | I   | 159 |     |     |
| AsFAD2-22 | ... | T | P | L | A | Y | L | A | W | P | Y | W | F | O | C | A | S | I | L | T | G | W | V | I | E | C | H | E | C | G | H | A | F | S | E | Y | Q | V | I | D | D | T | V | G | F | L | S | F | A | L | F | T | P | Y | F | S | W | K | Y | S | H | R | N | H | A | N | T | N | S | L | D | N | D | E | V | Y | I | P  | K | R  | K | S  | K  | V  | R   | .. | Y   | S   | ..  | K   | I   | 168 |     |
| AsFAD2-23 | TL  | G | P | I | L | R | O | S | L | M | F | V | W | Y | C | O | G | C | V | N | T | G | W | V | A | A | H | E | C | G | H | R | G | F | A | D | S | E | F | I | N | D | A | V | G | L | V | V | S | F | L | L | P | Y | F | A | V | Q | I | S | H | R | R | H | S | N | T | G | S | I | E | H | D | E | V | F | V | P  | T | L  | A | T  | K  | E  | Q   | E  | Q   | E   | A   | K   | K   | A   | 199 |
| AtFAD2    | ... | C | P | L | S | Y | L | A | W | P | Y | W | A | O | C | G | C | V | L | T | G | W | V | A | A | H | E | C | G | H | A | F | S | D | Y | Q | L | V | D | D | T | V | G | L | I | F | S | F | L | L | P | Y | F | S | W | K | Y | S | H | R | R | H | S | N | T | G | S | L | E | R | D | E | V | F | V | P | K | Q  | K | S  | A | I  | K  | .. | Y   | G  | ..  | K   | Y   | 171 |     |     |     |
| BnFAD2-1  | ... | H | P | L | S | Y | F | A | W | P | Y | W | A | O | C | G | C | V | L | T | G | W | V | A | A | H | E | C | G | H | A | F | S | D | Y | Q | L | V | D | D | T | V | G | L | I | F | S | F | L | L | P | Y | F | S | W | K | Y | S | H | R | R | H | S | N | T | G | S | L | E | R | D | E | V | F | V | P | K | K  | K | S  | D | I  | K  | .. | Y   | G  | ..  | K   | Y   | 171 |     |     |     |
| BnFAD2-2  | ... | H | P | L | S | Y | F | A | W | P | Y | W | A | O | C | G | C | V | L | T | G | W | V | A | A | H | E | C | G | H | A | F | S | D | Y | Q | L | V | D | D | T | V | G | L | I | F | S | F | L | L | P | Y | F | S | W | K | Y | S | H | R | R | H | S | N | T | G | S | L | E | R | D | E | V | F | V | P | K | K  | K | S  | D | I  | K  | .. | Y   | G  | ..  | K   | Y   | 171 |     |     |     |
| CaACET    | ... | A | P | L | A | Y | L | A | W | P | Y | W | F | O | C | A | S | I | L | T | G | W | V | I | E | C | H | E | C |   |   |   |   |   |   |   |   |   |   |   |   |   |   |   |   |   |   |   |   |   |   |   |   |   |   |   |   |   |   |   |   |   |   |   |   |   |   |   |   |   |   |   |   |   |   |   |   |    |   |    |   |    |    |    |     |    |     |     |     |     |     |     |     |

```

AhFAD2-1 LNN..... PL GRVL TL TI T L TL GVP LYL AFNVSG. RPYDR... FACHYDPYGP I YSD..... RE RLQI YI SDAGV LAVSYGL I RL VMAKGLA 249
AhFAD2-2 MNN..... PP GRAI SL FI T L TL GVP LYL AFNVSG. RPYDR... FASHYDPYAPI YSN..... RE RLLI YVSDS SVF AVTYL L YHI AT L KGLG 245
AsFAD2-1 LNN..... PP GRI I SL FAT L TL GVP LYL AFNVSG. RPYDR... FACHYAPASPI YNN..... RE RLQI GL SDI GI I TNSFI LYRVAL VKGLA 247
AsFAD2-2 LNT..... PP GRL I RL VI L CSI GVVL YL CFNVAG. HKYD... K FANHFDPKSP I FND..... SE RFQI LVTDI GL VT CYGL YKL AL ACGFT 246
AsFAD2-4 LDN..... PI GLVFTI LFR L TL GVP SYL I FNYGG. RKYD. E. GL ASHL YP C SP I F KD..... SQ RQGI FVSDVGVF VVL YVYVR VNMTCGAM 238
AsFAD2-5 LNT..... PP GRL FRL VI L CT VGVL YVCFNVSG. RKYE... K FANHFDPKSP I YND..... RE RFQI LL TDI GL VVAAYGL YKL AL VCGFK 246
AsFAD2-6 LNT..... PP GRL FRL VVLCTI GVL LYVCFNVSG. RKYE... K FANHFDPKSP I YNE..... RE RFQI LL TDI GL VTSYGL YKL AL ACGFT 246
AsFAD2-7 LNN..... PP GRVF TL VFRL TL GFP LYL LTNVSG. KKYE... R FANHFDP L SP I FTE..... RE RI QVVL SDI GI I AVVYAL KL LVAAKGF 246
AsFAD2-8 IDN..... PI GFVFM LFKFI LEFPL YL I NYGG. RKY... E. GL ACHFYPC SP L F KD..... SQ RAKVFL SDVGVF VFI YAYYRI MMTCGSI 237
AsFAD2-9 LDN..... PI GRS L TL LVKLC L GVYI YL SI NAAG. RPYDR... FASHYDPRSPI FSD..... SE RI LI VMSDI GLI CSSYL L YK VAMVKG FV 250
AsFAD2-10 LNN..... PP GRI L TL LVT L TNGVPL YL M FNVSG. RY YDR... FACHFD PASPI YSN..... RE RAQI FI SDAGI LAVMFGL FRL AMV KGL T 250
AsFAD2-11 LNN..... CP GNVF TL LARI TL GVP LYL LFNVSG. RDK... RFTNHF L P C SP I FNK..... SE RGYVVL SDI GI MAVL YAL YHL AVT CGGK 247
AsFAD2-12 LNN..... PP GRVFTL VFRFTL GFP LYL LTN I SG. KKYG... R FANHFDP L SP I FT D..... RE RI QVLVSD GL CL GVFYAI KL LVAAKGF A 245
AsFAD2-13 LNT..... PP GRL FRL VI L CSI GVL LYVCFNVSG. RKYD... R FANHFDPKSP I YSD..... RE RFQI LL TDI GL L VAS YGVYKVAL ACGFT 246
AsFAD2-20 LNN..... PP GRVF TL VFRFTL GFP LYL LTN I SG. KKYG... R FANHFDP L SP I FT D..... RE RI QVLVSD GL CL GVFYAI KL LVAAKGF A 244
AsFAD2-21 LDN..... PI GLVFTI LFR L TL GVP SYL I FNYGG. RKYD. E. GL ASHL YP C SP I F KD..... SQ RQGI FVSDVGVF VVL YVYVR VNMTCGAM 238
AsFAD2-22 LNN..... PP GRVF TL VFRL TL GFP LYL LTN I SG. KKYG... R FANHFDP L SP I FTE..... RE RI QVVS DI GI L AL L YAI KL LVAAKGAA 246
AsFAD2-23 SEHHDEGEFVQQT VGTLS RNFVI VI ML TL GVP AYLI YNVT S NKS YDPS. T VWNHYQSP SP I FT NGL ASDAHNCKL I LI SDVAL FAVF AVF YKFI QLTS FT 298
AtFAD2 LNN..... PL GRI MML TVQFVL GVP LYL AFNVSG. RPYDG... FACHFFPNAPI YND..... RE RLQI YL SDAGI LAVCFGL YRYAAACGVA 249
BnFAD2-1 LNN..... PL GRTVNL TVQFTL GVP LYL AFNVSG. RPYDGG... FACHFHPNAPI YND..... RE RLQI YI SDAGI LAVCYGL FRYAAACGVA 250
BnFAD2-2 LNN..... PL GRTVNL TVQFTL GVP LYL AFNVSG. RPYDGG... FACHFHPNAPI YND..... RE RLQI YI SDAGI LAVCYGL YRYAAACGVA 250
CaACET LNH..... PP GRLL I MFI T F TL GFP LYL FTNI SG. KKYE... R FANHFDPASPI FKE..... RE RFQVLL SDL GL LAVL YGVKL AVAAKGAA 242
CoCONJ LGNN..... PVGLMI TNL CKL TF GYAAVI MFNYTG. KKHKSG. GL ASHFYPC SP L F ND..... SE RNHVL FSDVGI CI VL YACYRI VMTGAM 243
CpEPOX LNN..... PP GRLL VL I I MFI T L TL GFP LYL LTN I SG. KKYD... R FANHFDPASPI FKE..... RE RFQVLL SDL GL LAVFYGI KVAVANKGAA 243
CtFAD2-1 LNN..... PP GRI I SL FAT L TL GVP LYL S FNVSG. RPYDR... FACHYAPASPI YNH..... RE RLQI VL SDVGI VANAFVL YRVAL VKGVS 249
CtFAD2-2 LNN..... PP GRI L TL LVT L TL GVP LYL M FNVSG. RY YDR... FACHFD PASPI YSN..... RE RAQI FI SDAGI FAVL YGL YRL AAVKGLV 250
CtFAD2-3 LNN..... PL GSF I VFVFKI VL GFP LYF VFNLYG. RKYE... KGI TSHFYPSPI FND..... SE RFQI FL TDL CVF GTL YGVYRL ALI KGTE 248
CtFAD2-4 LNN..... PL GSFVVFVKI VL GFP LYF VFNLYG. RKYE... KGI TSHFYPSPI FND..... SE RFQI FL TDL CVF GTL YGVYRL ALI KGTE 247
CtFAD2-5 LSN..... PVGSFI NL VFRL FF GFP LYF M FNLHG. RI YK... G FPSHF NPLGPI FND..... RE RANI VL SDAGI TVVYAL YRI GAKEGLQ 245
CtFAD2-6 LNN..... PL GNL FNTVVRL LF SFP NYFTFI HG. RPYN... G FVS HFYPC SP L F ND..... SE RKL VVL SDAGWAAF YGL YRI AASTS AT 244
CtFAD2-7 LNN..... CP GNVF TL LLRT TL GFP LYL I FNTYGG. RNYN... G FANHF L P C SP I FND..... SE RAQVVL SDVGI FAVL YAL YRL VLI CGLK 242
CtFAD2-8 LNT..... PP GRL FRL TI L CT VGVL YL I CFNVSG. RKYE... K FANHFDPKSP I YND..... RE RFQI LL TDI GL VTSYGL YKL AL ACGFA 247
CtFAD2-9 LDN..... PI GRT L TL MKL TL GVYI YL AI NAAG. RPYEK... FASHYDP RSENFSD..... NE RVL I LMSDI GL L S F S FL L YK VAMVCGFA 251
CtFAD2-10 LNN..... PP GRL I I VFTL L VL GVP LYL AFNVSG. RPYDR... FACHYAPASPI FTN..... RE RLQI WI SDAGI I AVSYL LYRVAL AKSVA 248
CtFAD2-11_ACET LNN..... PP GRVF TL VFRL TL GFP LYL LTN I SG. KKYG... R FANHFDPASPI FTE..... RE RI QVLVSDI GI LAVI YAI KL VAAAKGAA 244
DcACET FNN..... PP GRVL VMTL L LI GFP LYL M FNVSG. HKYER... VTS HCDPHS PLYTE..... RE RKQI I VSDVAI LAVI YGL YNL VL AKGFV 213
DcFAD2_OH LNN..... PP GRVI VML I T L LI GFP LYL M FNVSG. HKYER... VTS HYDP HS PLYTE..... RE RKQI I VSDFAI LAVL YGL YNL VL AKGFA 250
DsACET LNN..... PP GRVFTL VFRL TL GFP LYL LTNVSG. KKYE... R FANHFDPASPI FTE..... RE RI QVVL SDI GI I AVCYAL KVL VAAKGAT 213
FvACET LNN..... PL GRVL VMTL L LI GFP LYL M FNVSG. HKYER... VTS HYDP HS PLYTE..... RE RKQI I VSDI AI LAVI YGL YRL VLI KGFA 213
GhFAD2-1 LNN..... PP GRVL SL VVT L TL GVP MYL AFNVSG. RY YDR... LASHYNP YGP I YSD..... RE RLQVYI SDTGI FAVI YVLYKI AATKGLA 248
GhFAD2-2 FNN..... PP GRFL SI TI QL TL GVP LYL AFNVAG. RPYDR... FACHYDPYGP I FSD..... RE RLQI YI SDAGVL AVAYAL YRL VL AKGVG 249
GmFAD2-1 LNN..... PL GRAVSL LVT L TI GVP MYL AFNVSG. RPYDS... FASHYHPYAPI YSN..... RE RLLI YVSDVAL FSVTYS LYRVAL L KGLV 253
GmFAD2-2 LNN..... PP GRVL TL AVT L TL GVP LYL ALNVSG. RPYDR... FACHYDPYGP I YSD..... RE RLQI YI SDAGVL AVVYGL FRL AMAKGLA 249
HaACET LNN..... PP GRVF TL VFRL TL GFP LYL LTN I SG. KKYG... R FANHFDP L SP I FTE..... RE RI QVVI SDI GI LAVL YATKL L VEAKGAA 244
HaFAD2-1 FNN..... TVGRI VSMFVTL TL GVP LYL AFNVSG. RPYDR... FACHYVPTS PAVNE..... RKRYQI VMSDI GI VI T SFI LYR VAVAKGLV 244
HaFAD2-2 LNN..... PP GRI L TL LVT L TNGVPL YL M FNVSG. RY YDR... FACHFD PASPI YSN..... RE RAQI FI SDAGI LTVL FVL FRVAMTKGLT 250
HaFAD2-3 LNN..... PP GRI L TL LVT L TNGVPL YL M FNVSG. RY YDR... FACHFD PASPI YSN..... RE RAQI FI SDAGI LTVF YI L FRLAST KGLV 249
HhACET LNN..... PP GRVF VML STL LI GFP LYL M FNVSG. HKYER... VTS HYDP HS PLYSD..... RE RKEI I I SDVAI LTVI YGL YRL VL AKGFE 249
NtFAD2 LNN..... PP GRVMSL TVT L TL GVP LYL AFNVSG. RHYDR... FACHYDPYGP I YND..... RE RLQI FL SDAGVL GAGYL LYRI AL VKGLA 249
OeFAD2-1 LNN..... PP GRVMTL VI T L TL GVP LYL ALNVSG. RPYDR... FACHYDPHGP I YND..... RE RLQI YI SDVCVI ATSYI LYRVAL ACGLV 249
OeFAD2-2 LNN..... PP GRVL LL VFQL TL GVP LYL M FNVSG. RHYDR... FACHYNP HS PAYS D..... RE RAQI LI SDAGVL AVT CGL YRL TAAKGLA 249
RoOH SNN..... PP GRVL TL AAT L LL GVP LYL AFNVSG. RPYDR... FACHYDPYGP I FSE..... RE RLQI YI ADLGI FATT VLY QATMAKGLA 253
RhACET LNX..... PP GRVF TL VFRL TL GFP LYL LTN I SG. KKYG... R FANHFDP L SP I FT D..... RE RVQVLL SDL GL LAAFYAI KL LVAAKGF A 212
SiFAD2-1 MNN..... PP GRVL NL I VQFTL GVP LYL LFNVSG. RHYDR... FACHYDPKSP I YSD..... RE RLQI LI SDAGVL AVTYGL YRL AI AKGLA 249
SiFAD2-2 LNN..... PL GRVI TL VVT L TL GVP LYL LFNVSG. RPYNR... FACHFD PASPI YND..... RE RLQI FI SDAGI I AAVCVL YRVAL VKGLA 249
SIEPOX LDN..... TP GRI LI L VI ML TL GFP LYL LTNVSG. KKYD... RFTNHFDP L SP I FTE..... RE RI QVAL SDI GI VAVFYGL KF L VQT KGF G 245

```

Consensus

y

n

h

p

d



|                |                                                                 |     |
|----------------|-----------------------------------------------------------------|-----|
| AhFAD2-1       | TPFYKANVREAKECLYVESDQG. . . . . AQ. . . NKGVF WYNNKL .          | 383 |
| AhFAD2-2       | TPFYKALVREAKECLYVEPDDG. . . . . AS. . . KKG VY WYK NKF .        | 379 |
| AsFAD2-1       | TPFYVANVREAKECLFVEPD. . . . . EG. . . KKG VY WYK NKM .          | 379 |
| AsFAD2-2       | TSVI KANVREATECFYVEADE. . . SGSN. . . . . KKG VY WFK NKL .      | 381 |
| AsFAD2-4       | TPAI QAFVREMKGCI YVEPDDCDNDKNK. . . . . KS G VY WFK K. . .      | 372 |
| AsFAD2-5       | TPI I KANVREATECFFVEADE. . . GE DK. . . . . SK G VY WFN NKM .   | 381 |
| AsFAD2-6       | TPI I KANVREATECFFVEADE. . . GNN. . . . . K G VY WFN NKM .      | 379 |
| AsFAD2-7       | TPI FKANVREAKECMYI EPDQD. . . SE. . . . . HK G VY WYH KL .      | 379 |
| AsFAD2-8       | TPI LKAFVREMKECVYVESDNYDDDKK. . . . . SS G VY WFR K. . .        | 371 |
| AsFAD2-9       | TPFVVALVRETKNCLFI EPDEV. . . . . DE. . . KNG VY WYS NKY .       | 385 |
| AsFAD2-10      | TSVFKANYRETKECI YVDKDEE. . . . . AK. . . . . E G VY WYR NKV .   | 383 |
| AsFAD2-11      | TPPLKAFVRETKECI YAE. PD. . . DS SE. . . . . HK G VY WFS K. . .  | 379 |
| AsFAD2-13      | TPI FKANVREAKECI YI EPDEG. . . SK. . . . . HE G VY WYH KM .     | 378 |
| AsFAD2-15      | TPI VKANVREATECFFVEADE. . . ADS D. . . . . SK G VY WFN NKM .    | 381 |
| AsFAD2-20      | TPI FKANVREAKECI YI EPDEG. . . SK. . . . . HQGVY WYH KM .       | 377 |
| AsFAD2-21      | TPAI QAFVREMKECI YVEPDDCDNDKNK. . . . . KS G VY WFK K. . .      | 372 |
| AsFAD2-22      | TPI FKANVREAKECI YI EPDED. . . SE. . . . . HK GTY WYH KM .      | 379 |
| AsFAD2-23      | TPI ATALVRSFRDCI AVHPDEN. . . . . CK GVH MFL P K. . .           | 429 |
| AtFAD2         | TPWYVANVREAKECI YVEPDRE. . . . . GD. . . KKG VY WYNNKL .        | 383 |
| BnFAD2-1       | TPVVKANVREAKECI YVEPDRC. . . . . GE. . . KKG VY WYNNKL .        | 384 |
| BnFAD2-2       | TPVVKANVREAKECI YVEPDRC. . . . . GE. . . KKG VY WYNNKL .        | 384 |
| CaACET         | TPI LKANVREAKECI FI EPEKG. . . RE. . . . . SK G VY WYK F. . .   | 375 |
| CoCONJ         | TPFLKALVREMKDCI YVESDQ. . . . . GQK. . . KQGI Y WFK NKI .       | 374 |
| CpEPOX         | TPI LKANVREGRECMYI EPDS. . . . . K. . . . . LK G VY WYH KL .    | 374 |
| CtFAD2-1       | TPFYANVREAKECLFVEAD. . . . . EG. . . KGGVF WYK NK. . .          | 380 |
| CtFAD2-2       | TSVFKANYRETKECI YVDKDEE. . . . . VK. . . . . DGVY WYR NKI .     | 383 |
| CtFAD2-3       | TPI LQAI VRET KD CI FI EPEE. . . VNGE. . . . . KKGI Y WFK. . .  | 381 |
| CtFAD2-4       | TPI LEAVVRET KD CI FI EPEE. . . VNGE. . . . . KKGI Y WFK. . .   | 380 |
| CtFAD2-5       | TPI LKAI VRDT KECLFI E. . . . . EDPE. . . . . KKG VY WFK. . .   | 375 |
| CtFAD2-6       | TPI LKAFVRET KN CI YVEPD. . . EGAE. . . . . DS G VY WFR R. . .  | 376 |
| CtFAD2-7       | TPI LKANVRDTKECI YVE. PD. . . D. . E. . . . . KKG VY WYF K. . . | 372 |
| CtFAD2-8       | TPI I KANVREATECFFVEADE. . . GE GK. . . . . SK G VY WFN NKM .   | 382 |
| CtFAD2-9       | TPFVVALVRESKSCLEFI EPDES. . . . . DE. . . KNG GI Y WYRS KY .    | 387 |
| CtFAD2-10      | TPFYVANVREAKECLYVETD. . . . . EK. . . . . KGGVF WYK NKY .       | 380 |
| CtFAD2-11_ACET | TPI FKANVREAKECI YI EPDED. . . SE. . . . . HK GTY WYH KM .      | 377 |
| DcACET         | TPI LKANYREMK. . . . .                                          | 324 |
| DcFAD2_OH      | TPI LKANYREMKECI YVEKDEG. . . . . ET. . . . . K G VY WSR KDI .  | 383 |
| DsACET         | TPI FKANVREAKEC. . . . .                                        | 326 |
| FvACET         | TPI LKANYREMK. . . . .                                          | 324 |
| GhFAD2-1       | TPI YKANVREAKECLYVEPDVG. . . . . GGGGSK G VY WYR NKF .          | 385 |
| GhFAD2-2       | NPVYKAI VREAKECLYVEPDEG. . . . . DK. . . DK G VY WFR NKL .      | 383 |
| GmFAD2-1       | TPFYKALVREARECLYVEPDEG. . . . . TS. . . EK G VY WYR NKY .       | 387 |
| GmFAD2-2       | TPFVKANVREARECI YVEPDQS. . . . . TE. . . SK G VY WYNNKL .       | 383 |
| HaACET         | TPI FKANVREAKECI YI EPDED. . . SE. . . . . HK GTY WYH KM .      | 377 |
| HaFAD2-1       | TPFYVANVREMKECLEFVECD. . . . . EG. . . KGGVF WYK NKM N          | 378 |
| HaFAD2-2       | TSI FKANVRETKECI YVDKDEE. . . . . VK. . . . . DGVY WYR NKI .    | 383 |
| HaFAD2-3       | TSI FKANVRETKECI YVDKDED. . . . . VK. . . . . DGVY WYR NKI .    | 382 |
| HhACET         | TPI LKANYREMKECI YVEKDEG. . . . . ET. . . . . K G VY WYR SEF .  | 382 |
| NtFAD2         | TPVFKANVREAKECI YVEKDEA. . . . . SQ. . . . . GK G VY WYK NKL .  | 383 |
| OeFAD2-1       | TPFYKANVREAKECLYVEPDE. . . . . P. . . . . NKGVF WYK NKF .       | 381 |
| OeFAD2-2       | TPI FKANVREAKECI YVERDEG. . . . . DQ. . . NKGVF WYNNTL .        | 383 |
| RcOH           | TPFYKALVREAKECLFVEPDEG. . . . . AP. . . . . TQGVF WYR NKY .     | 387 |
| RhACET         | TPI FKANVRAKEXV. . . . .                                        | 326 |
| SifAD2-1       | TPI FKANVREAKECI YVEPDEG. . . . . DK. . . NKGVF WYNNKL .        | 383 |
| SifAD2-2       | TPFYKANVREAKECLYVEPDES. . . . . TP. . . . . DKGVF WYK NKF .     | 383 |
| SIEPOX         | TPFFKANVREAKECI YI ECDAD. . . . . SK. . . . . HKGTY WYH KM .    | 378 |
| Consensus      | a r                                                             |     |
